# Supplementary material
Source: publisher site journal article supplement (https://www.dovepress.com/article/273728)
Supplement: Supplementary file 1 [file get_supplementary_file.php]

**Supplemental Figure 1. The flowchart of the study.**

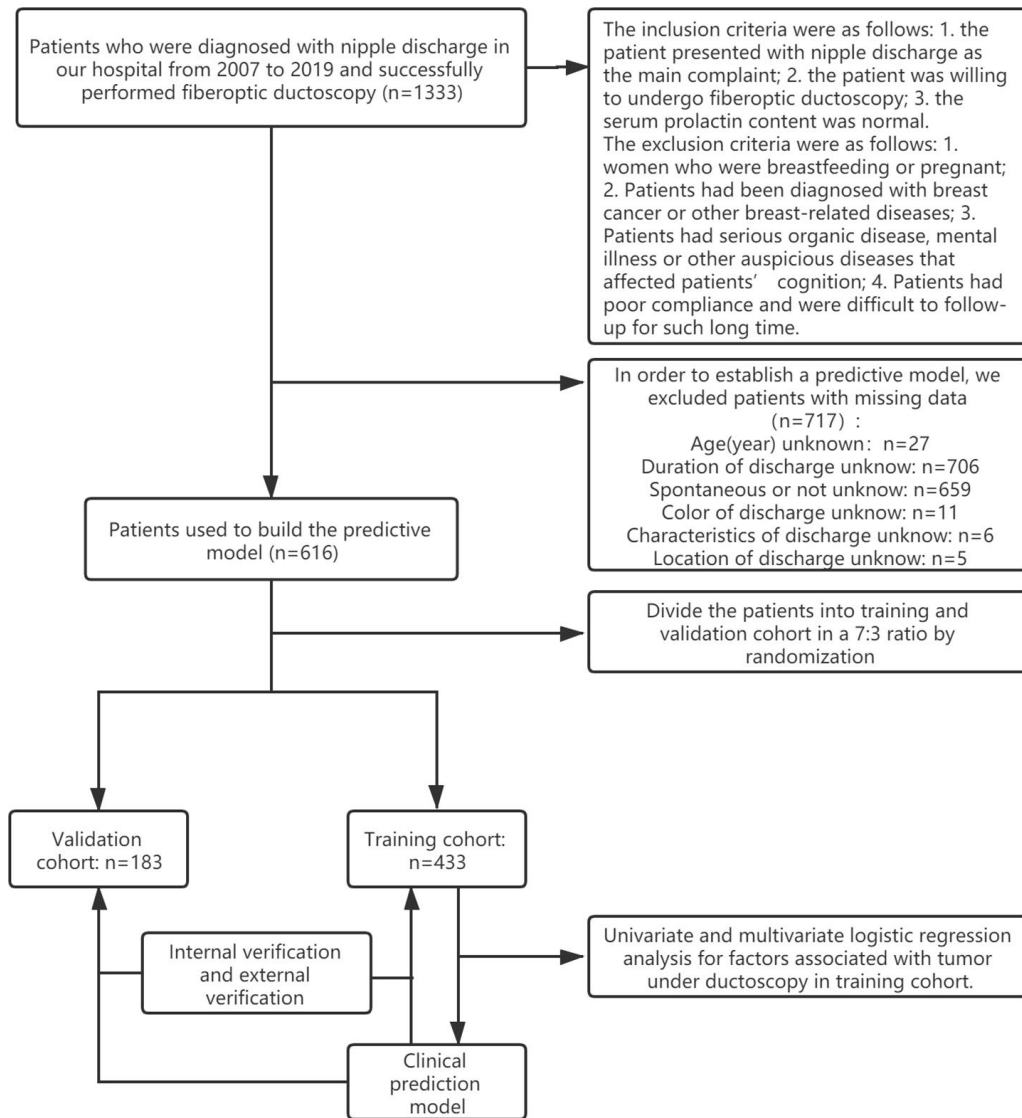

**Supplemental table1. Bonferroni adjustment.**

| Factors                       | <i>p</i> -value | Bonferroni adjustment of<br><i>p</i> -values |
|-------------------------------|-----------------|----------------------------------------------|
| Age (year)                    |                 | 0.002                                        |
| <=20 vs. 21-30                | 1.000           |                                              |
| <=20 vs. 31-40                | 1.000           |                                              |
| <=20 vs. 41-50                | 1.000           |                                              |
| <=20 vs. 51-60                | 1.000           |                                              |
| <=20 vs. 61-70                | 0.914           |                                              |
| <=20 vs. >70                  | 0.516           |                                              |
| 21-30 vs. 31-40               | 0.266           |                                              |
| 21-30 vs. 41-50               | 0.015           |                                              |
| 21-30 vs. 51-60               | 0.002           |                                              |
| 21-30 vs. 61-70               | 0.001           |                                              |
| 21-30 vs. >70                 | 0.001           |                                              |
| 31-40 vs. 41-50               | 0.071           |                                              |
| 31-40 vs. 51-60               | 0.008           |                                              |
| 31-40 vs. 61-70               | 0.006           |                                              |
| 31-40 vs. >70                 | 0.003           |                                              |
| 41-50 vs. 51-60               | 0.158           |                                              |
| 41-50 vs. 61-70               | 0.059           |                                              |
| 41-50 vs. >70                 | 0.016           |                                              |
| 51-60 vs. 61-70               | 0.410           |                                              |
| 51-60 vs. >70                 | 0.079           |                                              |
| 61-70 vs. >70                 | 0.247           |                                              |
| Duration of discharge         |                 | 0.008                                        |
| Days vs. Weeks                | 0.083           |                                              |
| Days vs. Months               | 0.024           |                                              |
| Days vs. Years                | 0.144           |                                              |
| Weeks vs. Months              | 0.669           |                                              |
| Weeks vs. Years               | 0.600           |                                              |
| Months vs. Years              | 0.251           |                                              |
| Color of discharge            |                 | 0.008                                        |
| Red vs. Yellow                | <0.001          |                                              |
| Red vs. White or colorless    | <0.001          |                                              |
| Yellow vs. White or colorless | <0.001          |                                              |
| Characteristics of discharge  |                 | 0.005                                        |
| Watery vs. Bloody             | <0.001          |                                              |
| Watery vs. Serosity           | 0.002           |                                              |
| Watery vs. Milky              | 0.003           |                                              |
| Watery vs. Soild              | 1.000           |                                              |
| Bloody vs. Serosity           | <0.001          |                                              |

|                    |        |
|--------------------|--------|
| Bloody vs. Milky   | <0.001 |
| Bloody vs. Soild   | 0.027  |
| Serosity vs. Milky | <0.001 |
| Serosity vs. Soild | 0.406  |
| Milky vs. Soild    | -      |

---

**Supplemental table 2. Univariate binary logistics regression analysis of clinical factors with the diagnosis of tumor or no tumor identified by ductoscopy.**

| Factors                      | Tumor vs. no tumor |            | <i>p</i> -value |
|------------------------------|--------------------|------------|-----------------|
|                              | OR                 | 95% CI     |                 |
| Age(year)                    |                    |            |                 |
| ≤20                          | 0.31               | 0.04-2.35  | 0.256           |
| 21-30                        | 0.20               | 0.07-0.55  | 0.002           |
| 31-40                        | 0.25               | 0.09-0.66  | 0.006           |
| 41-50                        | 0.32               | 0.12-0.85  | 0.022           |
| 51-60                        | 0.41               | 0.15-1.14  | 0.086           |
| 61-70                        | 0.53               | 0.18-1.57  | 0.251           |
| >70                          | Ref                |            |                 |
| Duration of discharge        |                    |            |                 |
| Years                        | 1.54               | 0.86-2.74  | 0.146           |
| Months                       | 1.92               | 1.09-3.40  | 0.025           |
| Weeks                        | 1.74               | 0.93-3.26  | 0.084           |
| Days                         | Ref                |            |                 |
| Side of discharge            |                    |            |                 |
| Unilateral                   | 2.99               | 2.00-4.47  | <0.001          |
| Bilateral                    | Ref                |            |                 |
| Location of discharge        |                    |            |                 |
| Single duct                  | 3.48               | 2.45-4.95  | <0.001          |
| Multiple ducts               | Ref                |            |                 |
| Spontaneous or not           |                    |            |                 |
| Spontaneous                  | 2.41               | 1.75-3.32  | <0.001          |
| Nonspontaneous               | Ref                |            |                 |
| Color of discharge           |                    |            |                 |
| Red                          | 12.29              | 8.43-17.92 | <0.001          |
| Yellow                       | 4.75               | 3.31-6.81  | <0.001          |
| White or colorless           | Ref                |            |                 |
| Characteristics of discharge |                    |            |                 |
| Watery                       | 1.56               | 0.18-13.70 | 0.689           |
| Bloody                       | 10.07              | 1.20-84.58 | 0.034           |
| Serosity                     | 3.48               | 0.42-29.03 | 0.250           |
| Milky                        | 0.44               | 0.05-4.12  | 0.472           |
| Solid                        | Ref                |            |                 |
| Ductal wall                  |                    |            |                 |
| Smooth                       | 8.03               | 5.88-10.96 | <0.001          |
| Rough                        | Ref                |            |                 |

**Supplemental table 3. Comparison of breast ductoscopy diagnosis and pathological diagnosis.**

| Ductoscopy diagnosis | Pathological diagnosis |          |
|----------------------|------------------------|----------|
|                      | Tumor                  | No tumor |
| Tumor                | 236                    | 20       |
| No tumor             | 33                     | 13       |

**Supplemental table 4. Comparison of breast ductoscopy diagnosis and ultrasound diagnosis.**

| Ductoscopy diagnosis | Ultrasonography |          |
|----------------------|-----------------|----------|
|                      | Tumor           | No tumor |
| Tumor                | 122             | 93       |
| No tumor             | 42              | 15       |

**Supplemental table 5. Relationship between the diagnosis of benign or malignant tumor identified by pathology and the clinical factors.**

| Factors                   | N      |        |                               |        | $\chi^2$ | <i>p</i> -value |
|---------------------------|--------|--------|-------------------------------|--------|----------|-----------------|
|                           | Benign | %      | Malignant<br>or<br>borderline | %      |          |                 |
| Single or multiple tumors |        |        |                               |        | 3.529    | 0.060           |
| Single                    | 200    | 85.11% | 14                            | 66.67% |          |                 |
| Multiple                  | 35     | 14.89% | 7                             | 33.33% |          |                 |
| blank                     | 32     |        | 14                            |        |          |                 |
| Location in ducts         |        |        |                               |        | 8.088    | 0.062           |
| Primary duct              | 111    | 47.64% | 8                             | 40.00% |          |                 |
| Secondary duct            | 66     | 28.33% | 4                             | 20.00% |          |                 |
| Level 3 duct              | 36     | 15.45% | 2                             | 10.00% |          |                 |
| Level 4 duct              | 6      | 2.58%  | 2                             | 10.00% |          |                 |
| Multistage ducts          | 14     | 6.01%  | 4                             | 20.00% |          |                 |
| blank                     | 34     |        | 15                            |        |          |                 |
| Distance from nipple      |        |        |                               |        | 6.111    | 1.127           |
| ≤1cm                      | 7      | 4.96%  | 0                             | 0.00%  |          |                 |
| 1-3cm                     | 83     | 58.87% | 6                             | 54.55% |          |                 |
| 3-5cm                     | 51     | 36.17% | 4                             | 36.36% |          |                 |
| >5cm                      | 0      | 0.00%  | 1                             | 9.09%  |          |                 |
| blank                     | 126    |        | 24                            |        |          |                 |
| Color of tumor            |        |        |                               |        | 0.635    | 0.915           |
| Red                       | 64     | 29.63% | 5                             | 27.78% |          |                 |
| Yellow                    | 100    | 46.30% | 8                             | 44.44% |          |                 |
| White                     | 9      | 4.17%  | 1                             | 5.56%  |          |                 |
| Mixed color               | 43     | 19.91% | 4                             | 22.22% |          |                 |
| blank                     | 51     |        | 17                            |        |          |                 |
| Shape of tumor            |        |        |                               |        | 1.404    | 0.720           |
| Spherical                 | 77     | 42.08% | 9                             | 52.94% |          |                 |
| Irregular                 | 46     | 25.14% | 4                             | 23.53% |          |                 |
| Lobulated                 | 30     | 16.39% | 1                             | 5.88%  |          |                 |
| Strip                     | 30     | 16.39% | 3                             | 17.65% |          |                 |
| blank                     | 84     |        | 18                            |        |          |                 |

**Supplemental table 6. Baseline data of patients with malignant or borderline tumor.**

| Factors                      | N  | %      | Valid% <sup>a</sup> |
|------------------------------|----|--------|---------------------|
| Age(year)                    |    |        |                     |
| ≤20                          | 0  | 0.00   | 0.00                |
| 21-30                        | 2  | 5.71   | 5.71                |
| 31-40                        | 8  | 22.86  | 22.86               |
| 41-50                        | 14 | 40.00  | 40.00               |
| 51-60                        | 4  | 11.43  | 11.43               |
| 61-70                        | 3  | 8.57   | 8.57                |
| >70                          | 4  | 11.43  | 11.43               |
| Blank                        | 0  | 0.00   |                     |
| Duration of discharge        |    |        |                     |
| Days                         | 2  | 5.71   | 11.76               |
| Weeks                        | 2  | 5.71   | 11.76               |
| Months                       | 10 | 28.57  | 58.82               |
| Years                        | 3  | 8.57   | 17.65               |
| Blank                        | 18 | 51.43  |                     |
| Side of discharge            |    |        |                     |
| Unilateral                   | 35 | 100.00 | 100.00              |
| Bilateral                    | 0  | 0.00   | 0.00                |
| Blank                        | 0  | 0.00   |                     |
| Location of discharge        |    |        |                     |
| Single duct                  | 33 | 94.29  | 94.29               |
| Multiple ducts               | 2  | 5.71   | 5.71                |
| Blank                        | 0  | 0.00   |                     |
| Spontaneous or not           |    |        |                     |
| Nonspontaneous               | 8  | 22.86  | 47.06               |
| Spontaneous                  | 9  | 25.71  | 52.94               |
| Blank                        | 18 | 51.43  |                     |
| Color of discharge           |    |        |                     |
| Red                          | 20 | 57.14  | 57.14               |
| Yellow                       | 13 | 37.14  | 37.14               |
| White or colorless           | 2  | 5.71   | 5.71                |
| Blank                        | 0  | 0.00   |                     |
| Characteristics of discharge |    |        |                     |
| Watery                       | 1  | 2.86   | 2.86                |
| Bloody                       | 18 | 51.43  | 51.43               |
| Serosity                     | 16 | 45.71  | 45.71               |
| Milky                        | 0  | 0.00   | 0.00                |
| Solid                        | 0  | 0.00   | 0.00                |
| Blank                        | 0  | 0.00   |                     |



|                           |                  |    |        |        |
|---------------------------|------------------|----|--------|--------|
| Ductal wall               |                  |    |        |        |
|                           | Smooth           | 23 | 65.71% | 67.65% |
|                           | Rough            | 11 | 31.43% | 32.35% |
|                           | Blank            | 1  | 2.86%  |        |
| Single or multiple tumors |                  |    |        |        |
|                           | Single           | 14 | 40.00% | 66.67% |
|                           | Multiple         | 7  | 20.00% | 33.33% |
|                           | blank            | 14 | 40.00% |        |
| Location in ducts         |                  |    |        |        |
|                           | Level 1 duct     | 8  | 22.86% | 40.00% |
|                           | Level 2 duct     | 4  | 11.43% | 20.00% |
|                           | Level 3 duct     | 2  | 5.71%  | 10.00% |
|                           | Level 4 duct     | 2  | 5.71%  | 10.00% |
|                           | Multistage ducts | 4  | 11.43% | 20.00% |
|                           | blank            | 15 | 42.86% |        |
| Distance from nipple      |                  |    |        |        |
|                           | ≤1cm             | 0  | 0.00%  | 0.00%  |
|                           | 1-3cm            | 6  | 17.14% | 54.55% |
|                           | 3-5cm            | 4  | 11.43% | 36.36% |
|                           | >5cm             | 1  | 2.86%  | 9.09%  |
|                           | blank            | 24 | 68.57% |        |
| Color of tumor            |                  |    |        |        |
|                           | Red              | 5  | 14.29% | 27.78% |
|                           | Yellow           | 8  | 22.86% | 44.44% |
|                           | White            | 1  | 2.86%  | 5.56%  |
|                           | Mixed color      | 4  | 11.43% | 22.22% |
|                           | blank            | 17 | 48.57% |        |
| Shape of tumor            |                  |    |        |        |
|                           | Spherical        | 9  | 25.71% | 52.94% |
|                           | Irregular        | 4  | 11.43% | 23.53% |
|                           | Lobulated        | 1  | 2.86%  | 5.88%  |
|                           | Strip            | 3  | 8.57%  | 17.65% |
|                           | blank            | 18 | 51.43% |        |
| ER                        |                  |    |        |        |
|                           | +                | 7  | 20.00% | 21.88% |
|                           | ++               | 11 | 31.43% | 34.38% |
|                           | +++              | 10 | 28.57% | 31.25% |
|                           | -                | 4  | 11.43% | 12.50% |
|                           | blank            | 3  | 8.57%  |        |
| PR                        |                  |    |        |        |
|                           | +                | 10 | 28.57% | 31.25% |
|                           | ++               | 8  | 22.86% | 25.00% |

|                  |                           |    |        |        |
|------------------|---------------------------|----|--------|--------|
|                  | +++                       | 6  | 17.14% | 18.75% |
|                  | -                         | 8  | 22.86% | 25.00% |
|                  | blank                     | 3  | 8.57%  |        |
| HER2             |                           |    |        |        |
|                  | +                         | 6  | 17.14% | 19.35% |
|                  | ++                        | 2  | 5.71%  | 6.45%  |
|                  | +++                       | 6  | 17.14% | 19.35% |
|                  | -                         | 17 | 48.57% | 54.84% |
|                  | blank                     | 4  | 11.43% |        |
| Ki67             |                           |    |        |        |
|                  | <15%                      | 20 | 57.14% | 66.67% |
|                  | 15%-30%                   | 3  | 8.57%  | 10.00% |
|                  | >30%                      | 7  | 20.00% | 23.33% |
|                  | blank                     | 5  | 14.29% |        |
| Types of cancer  |                           |    |        |        |
|                  | Atypical hyperplasia      | 9  | 25.71% | 25.71% |
|                  | CIS                       | 15 | 42.86% | 42.86% |
|                  | Invasive carcinoma        | 6  | 17.14% | 17.14% |
|                  | Special type carcinoma    | 3  | 8.57%  | 8.57%  |
|                  | Mixed carcinoma           | 2  | 5.71%  | 5.71%  |
|                  | blank                     | 0  | 0.00%  |        |
| Operation method |                           |    |        |        |
|                  | Breast conserving surgery | 9  | 25.71% | 25.71% |
|                  | Mastectomy                | 26 | 74.29% | 74.29% |
|                  | blank                     | 0  | 0.00%  |        |

---

a. Percentages excluding "Blank".

**Supplemental table 7. Comparison of the descriptive characteristics between the training cohort and the validation cohort.**

| Factors                      | N        |      |            |      | <i>p</i> -value |
|------------------------------|----------|------|------------|------|-----------------|
|                              | Training | %    | Validation | %    |                 |
| Age(year)                    |          |      |            |      | 0.201           |
| ≤44                          | 260      | 60.0 | 99         | 54.1 |                 |
| >44                          | 173      | 40.0 | 84         | 45.9 |                 |
| Side of discharge            |          |      |            |      | 0.708           |
| Unilateral                   | 378      | 87.3 | 157        | 85.8 |                 |
| Bilateral                    | 55       | 12.7 | 26         | 14.2 |                 |
| Spontaneous or not           |          |      |            |      | 1.000           |
| Nonspontaneous               | 279      | 64.4 | 118        | 64.5 |                 |
| Spontaneous                  | 154      | 35.6 | 65         | 35.5 |                 |
| Duration of discharge        |          |      |            |      | 0.996           |
| Days                         | 50       | 11.5 | 21         | 11.5 |                 |
| Weeks                        | 79       | 18.2 | 33         | 18.0 |                 |
| Months                       | 159      | 36.7 | 69         | 37.7 |                 |
| Years                        | 145      | 33.5 | 60         | 32.8 |                 |
| Color of discharge           |          |      |            |      | 0.918           |
| Non-red                      | 297      | 68.6 | 127        | 69.4 |                 |
| Red                          | 136      | 31.4 | 56         | 30.6 |                 |
| Characteristics of discharge |          |      |            |      | 0.983           |
| Non-bloody                   | 312      | 72.1 | 131        | 71.6 |                 |
| Bloody                       | 121      | 27.9 | 52         | 28.4 |                 |
| Location of discharge        |          |      |            |      | 0.565           |
| Multiple ducts               | 66       | 15.2 | 32         | 17.5 |                 |
| Single duct                  | 367      | 84.8 | 151        | 82.5 |                 |
| Tumor                        |          |      |            |      | 0.194           |
| No tumor                     | 265      | 61.2 | 101        | 55.2 |                 |
| Tumor                        | 168      | 38.8 | 82         | 44.8 |                 |

Supplemental Table 8. Collinearity Statistics

| Factors                      | Tolerance | VIF   |
|------------------------------|-----------|-------|
| Age_year                     | 0.986     | 1.015 |
| Side_of_discharge            | 0.188     | 5.325 |
| Spontaneous_or_not           | 0.964     | 1.037 |
| Duration_of_discharge        | 0.927     | 1.079 |
| Color_of_discharge           | 0.303     | 3.306 |
| Characteristics_of_discharge | 0.296     | 3.376 |
| Location_of_discharge        | 0.187     | 5.348 |
